# Supplementary material for: Association between Blood Pressure and HIV Status in Rural Uganda: Results of Cross-Sectional Analysis
Source: Glob Heart. 2021 Feb 10;16(1):12. doi: 10.5334/gh.858 (PMC7880004; doi:10.5334/gh.858)
Supplement: Appendix Table 1. — Comparison between individuals included vs. excluded in the final analysis. [file gh-16-1-858-s1.pdf]

**Appendix Table 1. Comparison between individuals included vs. excluded in the final analysis**

| <b>Community Sample</b>                 |                           |                           |
|-----------------------------------------|---------------------------|---------------------------|
| <b>Characteristics</b>                  | <b>Included (n = 600)</b> | <b>Excluded (n = 331)</b> |
| Age, median (IQR)                       | 44.3 (38.9, 54.3)         | 50.4 (43.1, 60.3)         |
| Sex (female), %                         | 55.0%                     | 54.5%                     |
| BMI, kg/m <sup>2</sup> , median (IQR)   | 23.4 (21.0, 26.6)         | 22.4 (20.3, 25.4)         |
| Self-reported HIV status                |                           |                           |
| Negative                                | 100%                      | 23.6%                     |
| Positive                                | --                        | 20.6%                     |
| Unknown                                 | --                        | 55.8%                     |
| <b>HIV Positive Participants</b>        |                           |                           |
| <b>Characteristics</b>                  | <b>Included (n = 721)</b> | <b>Excluded (n = 73)</b>  |
| Age in years, median (IQR)              | 46.9 (41.5, 53.5)         | 42.9 (34.9, 53.7)         |
| Sex (female), %                         | 59.8%                     | 54.7%                     |
| BMI in kg/m <sup>2</sup> , median (IQR) | 21.1 (19.3, 23.6)         | 20.9 (18.6, 22.8)         |
| HIV status                              |                           |                           |
| <b>Positive</b>                         | 100%                      | 100%                      |
